# Supplementary material for: Computational prediction and experimental confirmation of rhombohedral structures in Bi1.5CdM1.5O7 (M = Nb, Ta) pyrochlores
Source: Royal Society of Chemistry journal article supplement (doi:10.1039/c6ra27633d), 2017-01-01
Supplement: c6ra27633d1.pdf [file c6ra27633d1.pdf]

**Supplementary information:**

**Table S1** Full lists with atomic positions for BCN(r) and BCN(o) structures

a) BCN(r)  $a = 10.531895 \text{ \AA}$ ,  $\alpha = 90^\circ$

| x | Element | Atom Number | Fractional coordinates of atoms |            |            | x |
|---|---------|-------------|---------------------------------|------------|------------|---|
| x |         |             | u                               | v          | w          | x |
| x | 0: 1    | 1           | 0. 204946                       | 0. 000000  | -0. 000000 | x |
| x | 0: 1    | 2           | 0. 204946                       | 0. 500000  | 0. 500000  | x |
| x | 0: 1    | 3           | 0. 704946                       | -0. 000000 | 0. 500000  | x |
| x | 0: 1    | 4           | 0. 704946                       | 0. 500000  | -0. 000000 | x |
| x | 0: 1    | 5           | -0. 204946                      | 0. 500000  | 0. 500000  | x |
| x | 0: 1    | 6           | -0. 204946                      | 1. 000000  | 1. 000000  | x |
| x | 0: 1    | 7           | 0. 295054                       | 0. 500000  | -0. 000000 | x |
| x | 0: 1    | 8           | -0. 000000                      | 0. 204946  | -0. 000000 | x |
| x | 0: 1    | 9           | -0. 000000                      | 0. 704946  | 0. 500000  | x |
| x | 0: 1    | 10          | 0. 500000                       | 0. 704946  | 0. 000000  | x |
| x | 0: 1    | 11          | 0. 500000                       | -0. 204946 | 0. 500000  | x |
| x | 0: 1    | 12          | -0. 000000                      | 0. 295054  | 0. 500000  | x |
| x | 0: 1    | 13          | 0. 000000                       | 0. 795054  | 1. 000000  | x |
| x | 0: 1    | 14          | 0. 500000                       | 1. 204946  | 0. 500000  | x |
| x | 0: 1    | 15          | 0. 000000                       | -0. 000000 | 0. 204946  | x |
| x | 0: 1    | 16          | -0. 000000                      | 0. 500000  | 0. 704946  | x |
| x | 0: 1    | 17          | 0. 500000                       | -0. 000000 | 0. 704946  | x |
| x | 0: 1    | 18          | 0. 500000                       | 0. 500000  | -0. 204946 | x |
| x | 0: 1    | 19          | 0. 500000                       | 0. 000000  | 0. 295054  | x |
| x | 0: 1    | 20          | 0. 500000                       | 0. 500000  | 1. 204946  | x |
| x | 0: 1    | 21          | 0. 750000                       | 0. 454946  | 0. 750000  | x |
| x | 0: 1    | 22          | 0. 250000                       | 0. 045054  | 0. 250000  | x |
| x | 0: 1    | 23          | 0. 250000                       | 0. 545054  | 0. 750000  | x |
| x | 0: 1    | 24          | 0. 750000                       | 0. 545054  | 0. 250000  | x |
| x | 0: 1    | 25          | 0. 750000                       | 1. 045054  | 0. 750000  | x |
| x | 0: 1    | 26          | 0. 750000                       | 0. 954946  | 0. 250000  | x |
| x | 0: 1    | 27          | 0. 954946                       | 0. 250000  | 0. 750000  | x |
| x | 0: 1    | 28          | 0. 545054                       | 0. 750000  | 0. 250000  | x |
| x | 0: 1    | 29          | 0. 045054                       | 0. 250000  | 0. 250000  | x |
| x | 0: 1    | 30          | 0. 045054                       | 0. 750000  | 0. 750000  | x |
| x | 0: 1    | 31          | 0. 545054                       | 0. 250000  | 0. 750000  | x |
| x | 0: 1    | 32          | 0. 454946                       | 0. 750000  | 0. 750000  | x |
| x | 0: 1    | 33          | 0. 454946                       | 1. 250000  | 1. 250000  | x |
| x | 0: 1    | 34          | 0. 750000                       | 0. 250000  | 0. 545054  | x |
| x | 0: 1    | 35          | 0. 750000                       | 0. 750000  | 1. 045054  | x |
| x | 0: 1    | 36          | 0. 250000                       | 0. 750000  | 0. 954946  | x |
| x | 0: 1    | 37          | 0. 250000                       | 1. 250000  | 1. 454946  | x |
| x | 0: 1    | 38          | 0. 750000                       | 0. 750000  | 0. 454946  | x |
| x | 0: 1    | 39          | 0. 250000                       | 0. 250000  | 0. 045054  | x |
| x | 0: 1    | 40          | 0. 250000                       | 0. 750000  | 0. 545054  | x |
| x | 0: 1    | 41          | 0. 954946                       | 0. 750000  | 0. 250000  | x |
| x | 0: 1    | 42          | 0. 250000                       | 0. 954946  | 0. 750000  | x |
| x | 0: 1    | 43          | 0. 250000                       | 1. 454946  | 1. 250000  | x |
| x | 0: 1    | 44          | 0. 750000                       | 0. 250000  | 0. 954946  | x |
| x | 0: 1    | 45          | 0. 500000                       | 0. 295054  | 0. 000000  | x |
| x | 0: 1    | 46          | 0. 295054                       | -0. 000000 | 0. 500000  | x |
| x | 0: 1    | 47          | -0. 000000                      | 0. 500000  | 0. 295054  | x |
| x | 0: 1    | 48          | 0. 000000                       | 1. 000000  | 0. 795054  | x |
| x | 0: 1    | 49          | 0. 500000                       | 0. 500000  | 0. 500000  | x |
| x | 0: 1    | 50          | -0. 500000                      | 0. 000000  | 1. 000000  | x |
| x | 0: 1    | 51          | -0. 000000                      | 1. 000000  | -0. 500000 | x |
| x | 0: 1    | 52          | 1. 000000                       | -0. 500000 | -0. 000000 | x |
| x | 0: 1    | 53          | 1. 250000                       | 0. 750000  | 0. 250000  | x |
| x | 0: 1    | 54          | -0. 250000                      | -0. 250000 | -0. 250000 | x |
| x | 0: 1    | 55          | 0. 750000                       | 0. 250000  | 1. 250000  | x |
| x | 0: 1    | 56          | 0. 250000                       | 1. 250000  | 0. 750000  | x |
| x | Nb: 1   | 1           | 0. 125000                       | 0. 125000  | 0. 125000  | x |
| x | Nb: 1   | 2           | 0. 125000                       | 0. 625000  | 0. 625000  | x |
| x | Nb: 1   | 3           | 0. 625000                       | 0. 125000  | 0. 625000  | x |
| x | Nb: 1   | 4           | 0. 625000                       | 0. 625000  | 0. 125000  | x |
| x | Nb: 1   | 5           | -0. 125000                      | 0. 375000  | 0. 625000  | x |
| x | Nb: 1   | 6           | -0. 125000                      | 0. 875000  | 1. 125000  | x |
| x | Nb: 1   | 7           | 0. 375000                       | 0. 875000  | 0. 625000  | x |
| x | Nb: 1   | 8           | 0. 375000                       | 0. 625000  | -0. 125000 | x |
| x | Nb: 1   | 9           | 0. 375000                       | 1. 125000  | 0. 375000  | x |
| x | Nb: 1   | 10          | 0. 875000                       | 0. 625000  | 0. 375000  | x |

|   |       |    |            |            |            |   |
|---|-------|----|------------|------------|------------|---|
| x | Nb: 1 | 11 | 0. 625000  | -0. 125000 | 0. 375000  | x |
| x | Nb: 1 | 12 | 0. 625000  | 0. 375000  | 0. 875000  | x |
| x | Nb: 1 | 13 | 1. 125000  | -0. 125000 | 0. 875000  | x |
| x | Nb: 1 | 14 | 0. 875000  | 1. 125000  | 0. 875000  | x |
| x | Nb: 1 | 15 | 0. 375000  | 1. 375000  | 1. 125000  | x |
| x | Nb: 1 | 16 | 1. 125000  | 0. 375000  | 1. 375000  | x |
| x | Cd: 1 | 1  | 0. 625000  | 0. 625000  | 0. 625000  | x |
| x | Cd: 1 | 2  | 0. 625000  | 1. 125000  | 1. 125000  | x |
| x | Cd: 1 | 3  | 1. 125000  | 0. 625000  | 1. 125000  | x |
| x | Cd: 1 | 4  | 1. 125000  | 1. 125000  | 0. 625000  | x |
| x | Cd: 1 | 5  | -0. 625000 | -0. 125000 | 1. 125000  | x |
| x | Cd: 1 | 6  | -0. 625000 | 0. 375000  | 1. 625000  | x |
| x | Cd: 1 | 7  | -0. 125000 | 1. 125000  | -0. 625000 | x |
| x | Cd: 1 | 8  | -0. 125000 | 1. 625000  | -0. 125000 | x |
| x | Cd: 1 | 9  | 1. 125000  | -0. 625000 | -0. 125000 | x |
| x | Cd: 1 | 10 | 1. 625000  | -0. 625000 | 0. 375000  | x |
| x | Cd: 1 | 11 | 1. 375000  | 0. 625000  | 1. 375000  | x |
| x | Cd: 1 | 12 | 0. 875000  | 1. 375000  | 0. 125000  | x |
| x | Cd: 1 | 13 | 0. 875000  | 1. 875000  | 0. 625000  | x |
| x | Cd: 1 | 14 | 1. 375000  | 0. 125000  | 0. 875000  | x |
| x | Cd: 1 | 15 | 0. 125000  | 0. 875000  | 1. 375000  | x |
| x | Cd: 1 | 16 | 0. 625000  | 0. 875000  | 1. 875000  | x |
| x | Cd: 2 | 1  | 0. 125000  | 0. 125000  | 0. 125000  | x |
| x | Cd: 2 | 2  | 0. 125000  | 0. 625000  | 0. 625000  | x |
| x | Cd: 2 | 3  | 0. 625000  | 0. 125000  | 0. 625000  | x |
| x | Cd: 2 | 4  | 0. 625000  | 0. 625000  | 0. 125000  | x |
| x | Cd: 2 | 5  | -0. 125000 | 0. 375000  | 0. 625000  | x |
| x | Cd: 2 | 6  | -0. 125000 | 0. 875000  | 1. 125000  | x |
| x | Cd: 2 | 7  | 0. 375000  | 0. 875000  | 0. 625000  | x |
| x | Cd: 2 | 8  | 0. 375000  | 0. 625000  | -0. 125000 | x |
| x | Cd: 2 | 9  | 0. 375000  | 1. 125000  | 0. 375000  | x |
| x | Cd: 2 | 10 | 0. 875000  | 0. 625000  | 0. 375000  | x |
| x | Cd: 2 | 11 | 0. 625000  | -0. 125000 | 0. 375000  | x |
| x | Cd: 2 | 12 | 0. 625000  | 0. 375000  | 0. 875000  | x |
| x | Cd: 2 | 13 | 1. 125000  | -0. 125000 | 0. 875000  | x |
| x | Cd: 2 | 14 | 0. 875000  | 1. 125000  | 0. 875000  | x |
| x | Cd: 2 | 15 | 0. 375000  | 1. 375000  | 1. 125000  | x |
| x | Cd: 2 | 16 | 1. 125000  | 0. 375000  | 1. 375000  | x |
| x | Bi: 1 | 1  | 0. 625000  | 0. 625000  | 0. 625000  | x |
| x | Bi: 1 | 2  | 0. 625000  | 1. 125000  | 1. 125000  | x |
| x | Bi: 1 | 3  | 1. 125000  | 0. 625000  | 1. 125000  | x |
| x | Bi: 1 | 4  | 1. 125000  | 1. 125000  | 0. 625000  | x |
| x | Bi: 1 | 5  | -0. 625000 | -0. 125000 | 1. 125000  | x |
| x | Bi: 1 | 6  | -0. 625000 | 0. 375000  | 1. 625000  | x |
| x | Bi: 1 | 7  | -0. 125000 | 1. 125000  | -0. 625000 | x |
| x | Bi: 1 | 8  | -0. 125000 | 1. 625000  | -0. 125000 | x |
| x | Bi: 1 | 9  | 1. 125000  | -0. 625000 | -0. 125000 | x |
| x | Bi: 1 | 10 | 1. 625000  | -0. 625000 | 0. 375000  | x |
| x | Bi: 1 | 11 | 1. 375000  | 0. 625000  | 1. 375000  | x |
| x | Bi: 1 | 12 | 0. 875000  | 1. 375000  | 0. 125000  | x |
| x | Bi: 1 | 13 | 0. 875000  | 1. 875000  | 0. 625000  | x |
| x | Bi: 1 | 14 | 1. 375000  | 0. 125000  | 0. 875000  | x |
| x | Bi: 1 | 15 | 0. 125000  | 0. 875000  | 1. 375000  | x |
| x | Bi: 1 | 16 | 0. 625000  | 0. 875000  | 1. 875000  | x |

b) BCN(o) a = 10.86614 Å,  $\alpha = 90,33179^\circ$

| x | Element | Atom Number | Fractional coordinates of atoms |            |            | x |
|---|---------|-------------|---------------------------------|------------|------------|---|
| x |         |             | u                               | v          | w          | x |
| x | 0       | 1           | -0. 193941                      | 0. 135862  | -0. 368210 | x |
| x | 0       | 2           | -0. 138283                      | -0. 380930 | 0. 105948  | x |
| x | 0       | 3           | 0. 348270                       | -0. 369316 | -0. 353104 | x |
| x | 0       | 4           | 0. 298984                       | 0. 110140  | 0. 122042  | x |
| x | 0       | 5           | 0. 445711                       | -0. 378513 | 0. 120396  | x |
| x | 0       | 6           | 0. 403428                       | 0. 137819  | -0. 399391 | x |
| x | 0       | 7           | -0. 107771                      | 0. 135373  | 0. 123032  | x |
| x | 0       | 8           | -0. 354728                      | -0. 384803 | -0. 044079 | x |
| x | 0       | 9           | 0. 134270                       | -0. 374178 | 0. 124791  | x |
| x | 0       | 10          | -0. 368210                      | -0. 193941 | 0. 135862  | x |
| x | 0       | 11          | 0. 105948                       | -0. 138283 | -0. 380930 | x |
| x | 0       | 12          | -0. 353104                      | 0. 348270  | -0. 369316 | x |
| x | 0       | 13          | 0. 122042                       | 0. 298984  | 0. 110140  | x |

|   |    |    |           |           |           |   |
|---|----|----|-----------|-----------|-----------|---|
| x | 0  | 14 | 0.120396  | 0.445711  | -0.378513 | x |
| x | 0  | 15 | -0.399391 | 0.403428  | 0.137819  | x |
| x | 0  | 16 | 0.123032  | -0.107771 | 0.135373  | x |
| x | 0  | 17 | -0.044079 | -0.354728 | -0.384803 | x |
| x | 0  | 18 | 0.124791  | 0.134270  | -0.374178 | x |
| x | 0  | 19 | 0.135862  | -0.368210 | -0.193941 | x |
| x | 0  | 20 | -0.380930 | 0.105948  | -0.138283 | x |
| x | 0  | 21 | -0.369316 | -0.353104 | 0.348270  | x |
| x | 0  | 22 | 0.110140  | 0.122042  | 0.298984  | x |
| x | 0  | 23 | -0.378513 | 0.120396  | 0.445711  | x |
| x | 0  | 24 | 0.137819  | -0.399391 | 0.403428  | x |
| x | 0  | 25 | 0.135373  | 0.123032  | -0.107771 | x |
| x | 0  | 26 | -0.384803 | -0.044079 | -0.354728 | x |
| x | 0  | 27 | -0.374178 | 0.124791  | 0.134270  | x |
| x | 0  | 28 | -0.135862 | 0.193941  | 0.368210  | x |
| x | 0  | 29 | 0.380930  | 0.138283  | -0.105948 | x |
| x | 0  | 30 | 0.369316  | -0.348270 | 0.353104  | x |
| x | 0  | 31 | -0.110140 | -0.298984 | -0.122042 | x |
| x | 0  | 32 | 0.378513  | -0.445711 | -0.120396 | x |
| x | 0  | 33 | -0.137819 | -0.403428 | 0.399391  | x |
| x | 0  | 34 | -0.135373 | 0.107771  | -0.123032 | x |
| x | 0  | 35 | 0.384803  | 0.354728  | 0.044079  | x |
| x | 0  | 36 | 0.374178  | -0.134270 | -0.124791 | x |
| x | 0  | 37 | 0.193941  | 0.368210  | -0.135862 | x |
| x | 0  | 38 | 0.138283  | -0.105948 | 0.380930  | x |
| x | 0  | 39 | -0.348270 | 0.353104  | 0.369316  | x |
| x | 0  | 40 | -0.298984 | -0.122042 | -0.110140 | x |
| x | 0  | 41 | -0.445711 | -0.120396 | 0.378513  | x |
| x | 0  | 42 | -0.403428 | 0.399391  | -0.137819 | x |
| x | 0  | 43 | 0.107771  | -0.123032 | -0.135373 | x |
| x | 0  | 44 | 0.354728  | 0.044079  | 0.384803  | x |
| x | 0  | 45 | -0.134270 | -0.124791 | 0.374178  | x |
| x | 0  | 46 | 0.368210  | -0.135862 | 0.193941  | x |
| x | 0  | 47 | -0.105948 | 0.380930  | 0.138283  | x |
| x | 0  | 48 | 0.353104  | 0.369316  | -0.348270 | x |
| x | 0  | 49 | -0.122042 | -0.110140 | -0.298984 | x |
| x | 0  | 50 | -0.120396 | 0.378513  | -0.445711 | x |
| x | 0  | 51 | 0.399391  | -0.137819 | -0.403428 | x |
| x | 0  | 52 | -0.123032 | -0.135373 | 0.107771  | x |
| x | 0  | 53 | 0.044079  | 0.384803  | 0.354728  | x |
| x | 0  | 54 | -0.124791 | 0.374178  | -0.134270 | x |
| x | 0  | 55 | -0.380547 | -0.380547 | -0.380547 | x |
| x | 0  | 56 | 0.380547  | 0.380547  | 0.380547  | x |
| x | Nb | 1  | -0.247552 | 0.007542  | -0.243054 | x |
| x | Nb | 2  | -0.243054 | -0.247552 | 0.007542  | x |
| x | Nb | 3  | 0.007542  | -0.243054 | -0.247552 | x |
| x | Nb | 4  | -0.007542 | 0.247552  | 0.243054  | x |
| x | Nb | 5  | 0.247552  | 0.243054  | -0.007542 | x |
| x | Nb | 6  | 0.243054  | -0.007542 | 0.247552  | x |
| x | Nb | 7  | 0.252240  | -0.500000 | -0.252240 | x |
| x | Nb | 8  | -0.252240 | 0.252240  | -0.500000 | x |
| x | Nb | 9  | -0.500000 | -0.252240 | 0.252240  | x |
| x | Nb | 10 | 0.506430  | -0.506430 | 0.000000  | x |
| x | Nb | 11 | 0.000000  | 0.506430  | -0.506430 | x |
| x | Nb | 12 | -0.506430 | 0.000000  | 0.506430  | x |
| x | Cd | 1  | -0.246410 | 0.000000  | 0.246410  | x |
| x | Cd | 2  | 0.246410  | -0.246410 | 0.000000  | x |
| x | Cd | 3  | 0.000000  | 0.246410  | -0.246410 | x |
| x | Cd | 4  | 0.500000  | -0.500000 | 0.500000  | x |
| x | Cd | 5  | -0.247014 | -0.500000 | 0.247014  | x |
| x | Cd | 6  | 0.247014  | -0.247014 | -0.500000 | x |
| x | Cd | 7  | -0.500000 | 0.247014  | -0.247014 | x |
| x | Cd | 8  | 0.000000  | 0.000000  | 0.000000  | x |
| x | Bi | 1  | 0.251798  | -0.474942 | 0.272563  | x |
| x | Bi | 2  | 0.272563  | 0.251798  | -0.474942 | x |
| x | Bi | 3  | -0.474942 | 0.272563  | 0.251798  | x |
| x | Bi | 4  | 0.474942  | -0.251798 | -0.272563 | x |
| x | Bi | 5  | -0.251798 | -0.272563 | 0.474942  | x |
| x | Bi | 6  | -0.272563 | 0.474942  | -0.251798 | x |
| x | Bi | 7  | 0.227154  | 0.000000  | -0.227154 | x |
| x | Bi | 8  | -0.227154 | 0.227154  | 0.000000  | x |
| x | Bi | 9  | -0.000000 | -0.227154 | 0.227154  | x |
| x | Bi | 10 | 0.018905  | -0.018905 | 0.500000  | x |
| x | Bi | 11 | 0.500000  | 0.018905  | -0.018905 | x |
| x | Bi | 12 | -0.018905 | 0.500000  | 0.018905  | x |

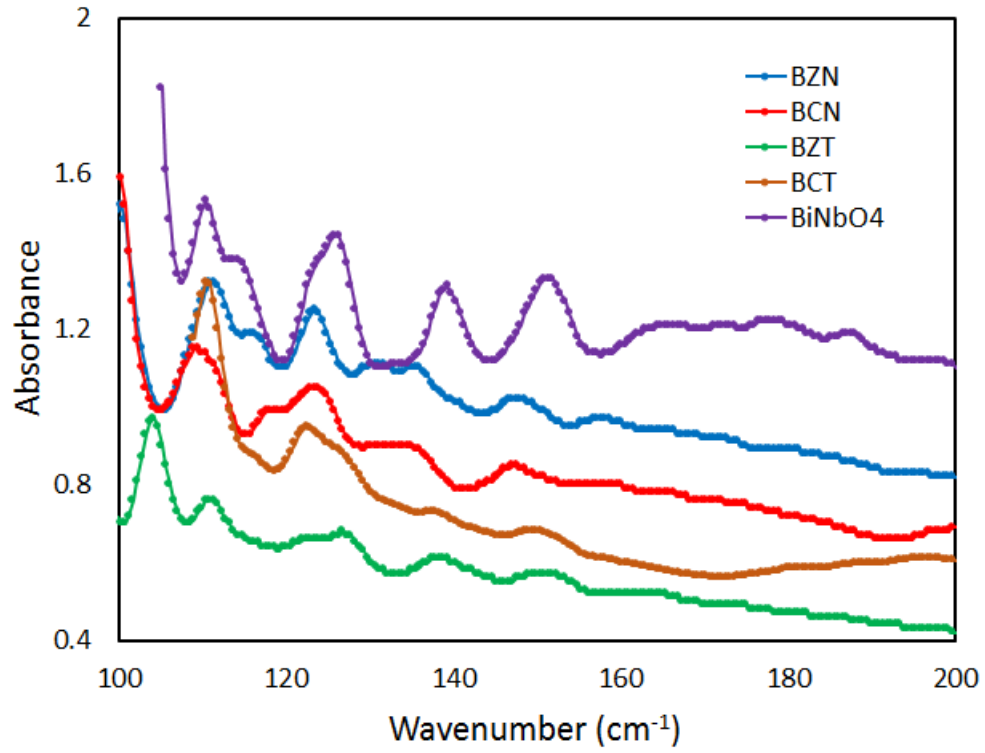

**Fig. S1** FTIR (ATR) spectra of BZN, BZT, BCN and BCT samples. The spectra of orthorhombic BiNbO<sub>4</sub> is also shown for comparison.
